# Supplementary material for: RETRACTED ARTICLE: Liver X receptors constrain tumor development and metastasis dissemination in PTEN-deficient prostate cancer
Source: PubMed Central journal article supplement (PMC5585406; doi:10.1038/s41467-017-00508-5), 2017-09-05
Supplement: 41467_2017_508_MOESM1_ESM.pdf [file 41467_2017_508_MOESM1_ESM.pdf]

File Name: Supplementary Information

Description: Supplementary Figures and Supplementary Tables

A



B



### Supplementary Figure 1 | Human datasets analysis

(A) ONCOMINE boxed plot of *ACACA*, *SREBF1*, *APOC1*, *APOC2* and *ENG* expression levels between human prostate gland, prostate carcinoma and metastasis in datasets referred Grasso *et al.*, 2012<sup>55</sup>; Taylor *et al.*, 2010<sup>5</sup>; Yu *et al.*, 2004<sup>56</sup>. All data are represented as mean  $\pm$  SEM. \*\*\*  $p < 0.001$ . (B) Gene Set Enrichment Analysis of LXR target gene signature based on PTEN status using Taylor *et al.*, 2010<sup>2</sup> and Yu *et al.*, 2004<sup>41</sup> datasets.



### Supplementary Figure 2 | LXR targets status in mice lacking LXRs and/or PTEN

(A) Western blot analysis of PTEN, AKTser473, AKT, FASN, APOE accumulation on prostatic samples from wild type and *Lxraβ*<sup>-/-</sup> mice. (B) HE-stained sections on prostatic samples from WT and *Lxraβ*<sup>-/-</sup> and immunofluorescence against AKT-ser473 and ABCA1, Scale bar 100 μm. (C) Relative expression, using prostatic samples from wild type and *Lxraβ*<sup>-/-</sup> mice, of LXR target genes previously described to have LXRE within promoter sequences (N = 9/10). (D) Western blot analysis of FASN, APOE, NR1H3 accumulation on prostatic samples from wild type, *Pten*<sup>pc-/-</sup>, *Pten*<sup>pc-/-</sup>*Lxraβ*<sup>-/-</sup> and *Lxraβ*<sup>-/-</sup> mice. Data are represented as mean ± SEM and statistical analysis has been performed with the Student's *t*-test; \*\*\* p < 0.001.



**Supplementary Figure 3 | LXR-null mice prostatic phenotype**

(A) Gross anatomy and (B) weight of representative prostates from 1 year-old *WT* and *Lxraβ*<sup>-/-</sup> mice. Scale bar, 1cm (N = 16/10). (C) Hematoxylin and eosin (HE) staining of prostate sections from *WT* and *Lxraβ*<sup>-/-</sup> mice (6 months old), Scale bar, 100μm. Data are represented as mean ± SEM and statistical analysis has been performed using Student's *t*-test.



### Supplementary Figure 4 | *PtenLxr*-null mutants prostatic phenotype

(A) HE-stained entire sections of representative dorsal prostate (DP) at 8, 11 and 20 weeks from *Pten<sup>pc-/-</sup>* and *Pten<sup>pc-/-</sup> Lxra $\beta$ <sup>-/-</sup>* mice. Scale bar, 100µm. (B) Histological highlighting of normal acini structures in 8 weeks old. Representative pictures obtained from *Pten<sup>pc-/-</sup>* and *Pten<sup>pc-/-</sup> Lxra $\beta$ <sup>-/-</sup>* mice prostates, (N=6 per group), scale bar, 100µm. (C-D) Histological evaluation of dorsal lobe lesions, Low-Grade PIN, High-Grade PIN, In situ Carcinoma or Invasive Carcinoma. Three distant sections from each mouse (N=6 per group) were scored, scale bar, 100µm. (E-F) Ki67 and SMA (Smooth Muscle Actin) immunofluorescence performed on 8 weeks old *Pten<sup>pc-/-</sup>* and *Pten<sup>pc-/-</sup> Lxra $\beta$ <sup>-/-</sup>* prostate specimens and invasive carcinoma frequency analysis (N=6 per group), scale bar, 100µm. All data are represented as mean  $\pm$  SEM, statistical significance has been analysed using Student's *t*-test. \*  $p < 0.05$ ; \*\*  $p < 0.01$ ; \*\*\*  $p < 0.001$ .



### Supplementary Figure 5 | *PtenLxr*-null mutants prostatic phenotype

(A) Representative Ki67 immunohistochemistry on 8 weeks old prostatic tissues from *Pten*<sup>pc-/-</sup> and *Pten*<sup>pc-/-</sup>*Lxra*β<sup>-/-</sup> mice and, (B) Quantification of Ki67-positive staining (N=6 per group), scale bar 100μm. (C) Representative and quantitative analysis of Ki67 immunohistochemistry on prostatic tissues from WT and *Lxra*β<sup>-/-</sup> mice (6-months old, N=8 per group), scale bar 100μm. (D) Relative expression of *Nkx3.1*, *Clu*, *Ki67*, *Ccna2*, *Ccnb2* and *Ccnd2* in prostate from 6 months old WT, *Pten*<sup>pc-/-</sup> and *Pten*<sup>pc-/-</sup>*Lxra*β<sup>-/-</sup> mice (N = 10/7/8). (E) Gross anatomy of lumbar lymph nodes from *Pten*<sup>pc-/-</sup>*Lxra*β<sup>-/-</sup> mouse. (F) Representative lymph node and lung prostate metastasis immunofluorescent staining using specific (CK18/PSCA) prostatic markers in 2 months old *Pten*<sup>pc-/-</sup> and *Pten*<sup>pc-/-</sup>*Lxra*β<sup>-/-</sup> mice (N=7 per group), scale bar 100μm. (G) Prostate metastasis frequency evaluation. All data are represented as mean ± SEM, statistical significance has been analysed using Student's *t*-test. \*\*\* p<0.001.



### Supplementary Figure 6 | Expression of LXR targets in PTEN positive/negative cells

(A) PCR-based identification of mutant MPEC lines for *Pten* wild-type allele, recombination of *PtenloxP* alleles, *Lxra* and *Lxr $\beta$*  wild-type or KO alleles, Cre Transgene. (B) Genotype validation using analysis of relative expression of *Nr1h3* (*Lxra*), *Nr1h2* (*Lxr $\beta$* ), *Pten* and Cre recombinase in the various MPEC lines. (N.D. not detectable). (C) Immunofluorescence and positive-cell quantification against AKTS473, ABCA1 and FASN in MPEC wild-type (+/+) and *Pten* $^{-/-}$ . Scale bar 100 $\mu$ m (D) PTEN, AKTS473, AKT, APOE, FASN and  $\beta$ -ACTIN protein accumulation levels in LNCaP PTEN in presence or absence of Doxycycline treatment. (E) Immunofluorescence against AKTser473 and ABCA1 in LNCaP cells transfected with PTEN or PTENC124A expression vectors. Scale bar 100 $\mu$ m. (F) Immunofluorescence against ABCA1 in PC3 cells transfected with PTEN or PTENC124A expression vectors. PTEN or PTEN-mutant accumulation is visualized using GFP. Scale bar 100 $\mu$ m (G) Relative expression levels of *Abca1*, *Abcg1*, *Fasn*, *Idol* and *Pten* and (H) PTEN, AKTS473, AKT, APOE, FASN and  $\beta$ -ACTIN protein accumulation levels in PC3 cells transfected with PTEN or PTENC124A vectors. For whole experiments, data are the result of three independent experiments. All the statistical analyses were performed with the Student's *t*-test and are represented as mean  $\pm$  SEM; \*  $p < 0.05$ ; \*\*\*  $p < 0.001$ .



### Supplementary Figure 7 | Expression of LXR targets in various PI3K/AKT signaling pathway context

(A,B) Immunofluorescence against AKTS473 and ABCA1 of LNCaP and PC3 cells treated with PI3K inhibitors Wortmannin (0,5μM) or LY294002 (20μM), scale bar 100μm. (C,D) Relative expression and protein accumulations of LXR targets in PC3 cells treated with PI3K inhibitors Wortmannin (0,5μM) or LY294002 (20μM). (E) Immunoblot against AKTS473, AKT, APOE, FASN and β-ACTIN in LNCaP cells transfected with AKTd/n expression vector. (F) Relative accumulation of *ABCA1*, *ABCG1*, *FASN* and *IDOL* in PC3 cells transfected with AKTd/n expression vector. (G) Immunoblot against AKTS473, AKT, APOE, FASN and β-ACTIN in PC3 cells transfected with AKTd/n expression vector. (H) Immunoblot against PTEN, AKTS473, AKT, APOE, FASN and β-ACTIN in DU145 cells transfected with myrAKT and p110CAAX expression vectors. (I) Luciferase activity measured in MEF *Pten*<sup>-/-</sup> or (J) MEF +/+ transfected with 3xLXREtk-Luc reporter construct or tk-Luc as a control and expression vector encoding PTEN, PTENC124A mutant treated or not with T0901317 (1μM). (J) Immunofluorescence against AKTser473, ABCA1 and FASN on MPEC +/+, *Pten*<sup>-/-</sup>, *Lxraβ*<sup>-/-</sup> or *Pten*<sup>-/-</sup>*Lxraβ*<sup>-/-</sup>, scale bar 100μm. (K) Relative accumulation of *Abca1* and *Fasn* in MPEC +/+ treated with DMSO, Wortmannin (0.5μM), LY294002 (20μM) and/or T0901317 (1μM). All the experiments have been done into three independent experimental replicates. All the statistical analyses were performed with the Student's *t*-test and are represented as mean ± SEM. \* *p*<0.05; \*\* *p*<0.01; \*\*\* *p*<0.001.





### Supplementary Figure 8 | Sterol metabolism in PTEN-null context

(A) Levels of  $7\alpha$ -hydroxycholesterol,  $7\beta$ -hydroxycholesterol,  $4\beta$ -hydroxycholesterol,  $4\alpha$ -hydroxycholesterol, cholestane- $3\beta,5\alpha,6\beta$ -triol (CT),  $24(S)$ -hydroxycholesterol,  $25$ -hydroxycholesterol,  $7$ -ketocholesterol,  $6$ -oxo-cholestan- $3\beta,5\alpha$ -diol in prostatic samples from wild type (*WT*) and *Pten*<sup>pc-/-</sup> mice (N=4 per group) and (B) PC3 cells transfected with empty vector or PTEN and dnAKT-encoding vectors (N=4 per condition). (C,D) Relative expression and protein accumulations of LXR targets in LNCaP and PC3 cells treated with Wortmannin (0,5 $\mu$ M), LY294002 (20 $\mu$ M) and/or T0901317 (1 $\mu$ M), experiments have been performed into three experimental replicates. (E) FACS analysis showing the cell surface marker encoded by the SULT2B1b vector used to quantify the level of transduction. All data are represented as mean  $\pm$  SEM and have been analysed using the Student's *t*-test; \*  $p < 0.05$ ; \*\*  $p < 0.01$ ; \*\*\*  $p < 0.001$ .



### Supplementary Figure 9 | Sterol metabolism in PTEN-null context

(A) Analysis of *Cyp7a1*, *Cyp46a1* and *Cyp27a1* expression by qPCR on dorsal prostate of 6 months old *wild type* and *Pten<sup>pc-/-</sup>* mice. (B-C) LXR target genes expression analyse by qPCR on MPEC +/+ or MPEC *Pten<sup>-/-</sup>* and PC3 cells treated with increasing concentration of Vitamin E during 24 hours. All data are represented as mean  $\pm$  SEM, have been performed into three independent experimental replicates, and analysed with Student's *t*-test. \*  $p < 0.05$ ; \*\*\*  $p < 0.001$ .



### Supplementary Figure 10 | Sterol metabolism in PTEN-null context

(A-B) Luciferase activity measurement in *wild type* MEF transfected with Gal4-LXR $\alpha$ LBD or/and Gal4-LXR $\beta$ LBD and UAS-Luciferase after incubation with medium conditioned during 24 hours by MPEC +/+, MPEC *Pten*<sup>-/-</sup> and PC3 cells treated with EtOH or Vitamin E (200  $\mu$ M). FBS and T0901317 were used as controls (N=3 per condition). All data are represented as mean  $\pm$  SEM. Student's *t*-test has been performed. \*  $p < 0.05$ ; \*\*\*  $p < 0.001$ .



### Supplementary Figure 11 | Cholesterol *de novo* synthesis in PTEN-null context

(A) qPCR analysis of *HMGCR*, *ABCA1* and *FASN* expression in LNCaP PTEN treated with doxycycline (25 $\mu$ M), simvastatin (2,5 $\mu$ M) and/or T0901317 (1 $\mu$ M). (B) qPCR analysis of *HMGCR*, *ABCA1* and *FASN* expression in PC3 cells treated with simvastatin (2,5 $\mu$ M) and/or T0901317 (1 $\mu$ M). (C) *Abcg1* and *Idol* relative expression in MPEC *Pten*<sup>-/-</sup> and *Pten*<sup>-/-</sup>*Lxra*<sup>β-/-</sup> treated with DMSO, Simvastatin (2,5 $\mu$ M) and/or T0901317 (1 $\mu$ M). (D) Immunoblot against AKTS473, mature-SREBP2 (mSREBP2), HMGCR, SQLE and  $\beta$ -ACTIN in PC3 cells treated with Wortmannin (0,5 $\mu$ M) or LY294002 (20 $\mu$ M). (E) Immunoblot against HMGCR, SQLE and  $\beta$ -ACTIN in PC3 cells transfected with AKT $\Delta$ n expression vector. (F) Luciferase activity measurement in wild type MEF transfected with Gal4-LXR $\alpha$ LBD or Gal4-LXR $\beta$ LBD and UAS-Luciferase after incubation with medium conditioned by PC3 cells transfected with Ctrl, siGFP, or siSREBP2. FBS and T0901317 were used as controls. Experiments are the result of three independent biological replicates. All the statistical analyses have been performed with the Student's *t*-test and are represented as mean  $\pm$  SEM. \*  $p < 0.05$ ; \*\*  $p < 0.01$ ; \*\*\*  $p < 0.001$ .



### Supplementary Figure 12 | Cholesterol *de novo* synthesis in PTEN-null context

(A) Relative weight of prostates wild type (WT), *Pten<sup>pc-/-</sup>* and *Pten<sup>pc-/-</sup>* treated with Simvastatin (*Pten<sup>pc-/-</sup>* + Sim), (N= 6/6/6). (B) Relative expression *Ccna2*, *Ccnb2* and *Clusterin* in prostate from WT, *Pten<sup>pc-/-</sup>* and *Pten<sup>pc-/-</sup>* + Sim mice. (C) Acini breaks have been quantification using following criteria: discontinuous SMA staining and presence of Ki67-positive staining in surrounding stromal compartment (N = 6/6). (D) Representative Ki67 immunohistochemistry on prostatic tissues from each condition. Scale bar 100 $\mu$ m. (E) Quantification of Ki67-positive staining (N = 6 per group). All data are represented as mean  $\pm$  SEM and analysed using Student's *t*-test. \*  $p < 0.05$ ; \*\*\*  $p < 0.001$ .



**Supplementary Figure 13 | Transcriptome profiling in mice lacking LXRs and/or PTEN**

(A) Volcano plot indicates differential gene expression in dorsal prostate samples from  $Pten^{pc-/-}$  compared with  $Pten^{pc-/-}Lxra\beta^{-/-}$  (N=3 per group). Downregulated genes are visualized in blue and upregulated genes in red. (B) GSEA based on MSigDB Hallmark ([www.broadinstitute.org](http://www.broadinstitute.org)) (C) Heatmap shows gene expression of Epithelial Mesemchymal Transition cluster in dorsal prostate samples from WT,  $Lxra\beta^{-/-}$ ,  $Pten^{pc-/-}$ ,  $Pten^{pc-/-}Lxra\beta^{-/-}$  mice (N=3 per group).

**FIG1E**



**Supplementary Figure 14 I related figure is indicated in red.**  
Uncropped scans of western blot with molecular weight markers.



**Supplementary Figure 14 (continued) | related figure is indicated in red.**  
 Uncropped scans of western blot with molecular weight markers.



**FIG 5F****FIG 5G****FIG S8C****FIG S8D****FIG S11D****FIG S11E**

**Supplementary Figure 14 (continued) | related figure is indicated in red.**  
 Uncropped scans of western blot with molecular weight markers.

**FIG6B**



**FIG6E**



**Supplementary Figure 14 (continued) I related figure is indicated in red.**  
Uncropped scans of western blot with molecular weight markers.

FIG S6H complement.

PC3



FIG S2D



Supplementary Figure 14 (continued) I related figure is indicated in red.  
Uncropped scans of western blot with molecular weight markers.

| <i>Antibody</i>      | <i>Dilution</i> | <i>Manufacturer</i> | <i>Reference</i> |
|----------------------|-----------------|---------------------|------------------|
| APOE                 | 1/500           | Gift From A. Mazur  | ---              |
| pAKTS473             | 1/1000          | Abcam               | Ab9271           |
| $\beta$ -ACTIN       | 1/2000          | Sigma-Aldrich       | A2066            |
| GAPDH                | 1/15000         | Novus Biologicals   | NB300221         |
| AKT1                 | 1/1000          | Cell Signaling Tech | #2967            |
| SLUG                 | 1/500           | Cell Signaling Tech | #9585            |
| ZEB1                 | 1/500           | Cell Signaling Tech | #3396            |
| FASN                 | 1/500           | Santa cruz          | SC-20140         |
| PTEN                 | 1/1000          | Cell Signaling Tech | #138G6           |
| SNAI1                | 1/500           | Cell Signaling Tech | #3879            |
| VIMENTIN             | 1/500           | Santa cruz          | SC-5141          |
| MMP9                 | 1/1000          | Abcam               | Ab38898          |
| E-CAD                | 1/500           | Cell Signaling Tech | #3195            |
| N-CAD                | 1/500           | Cell Signaling Tech | #4061            |
| SREBP2               | 1/200           | BD Biosciences      | BD557037         |
| SQLE                 | 1/500           | AP proteintech      | 12544            |
| HMGCR                | 1/500           | Gift From N. Zelcer | none             |
| LXR $\alpha$ (human) | 1/200           | PPMX                | PP-PPZ0412-10    |
| LXR $\beta$ (human)  | 1/200           | PPMX                | PP-K8917-10      |
| Lxr $\alpha$ (mouse) | 1/500           | Personal production | ---              |

**Supplementary Table 1: List of antibodies**  
Antibodies used for western blot analysis.

|                |       |                       |                         |            |
|----------------|-------|-----------------------|-------------------------|------------|
| ABCA1          | 1/200 | Direct Alexa          | Novus                   | NB 400-105 |
| pAKTS473       | 1/100 | Direct Alexa          | Abcam                   | Ab9271     |
| $\beta$ -ACTIN | 1/200 | Direct Alexa          | Sigma-Aldrich           | A2066      |
| CK18           | 1/200 | TSA amplification     | Santa cruz              | SC-28264   |
| PSCA           | 1/50  | Direct Alexa          | Santa cruz              | SC-28819   |
| PCNA           | 1/100 | Direct Alexa          | Santa cruz              | SC-7907    |
| Ki67           | 1/500 | Novared amplification | Spring Bioscience Corp. | M3062      |
| FASN           | 1/100 | Direct Alexa          | Santa cruz              | SC-20140   |
| PTEN           | 1/100 | TSA amplification     | Cell Signaling Tech     | #138G6     |
| SNAI1          | 1/100 | Direct Alexa          | Cell Signaling Tech     | #3879      |
| VIMENTIN       | 1/100 | Direct Alexa          | Santa cruz              | SC-5141    |
| MMP9           | 1/300 | Direct Alexa          | Abcam                   | Ab38898    |

**Supplementary Table 2: List of antibodies**

Antibodies used for immunofluorescence and immunohistochemistry analysis.

| <b>Mouse primers</b> | <b>Forward</b>             | <b>Reverse</b>          |
|----------------------|----------------------------|-------------------------|
| ABCA1                | GGAGCTGGGAAGTCAACAAC       | ACATGCTCTCTTCCCCTCAG    |
| ABCG1                | GACCTTTCCTACTCTGTACCCG     | TTCATGAGTGTGGACTTCCCAG  |
| IDOL                 | TACCGAGCCATCACCGAAAC       | CCCTCCTGGCATGGTCATAG    |
| APOE                 | TCTGACCAGGTCCAGGAAGAG      | CATCAGTGCCGTGAGTTCTTG   |
| FASN                 | AGCGGCCATTTCCATTGCC        | CCATGCCCAGAGGGTGGTTG    |
| ACACA                | TTTCACATTCCGAGCAAGGGA      | TTAGCAGCCCCAAGGTACAG    |
| SCD1                 | CATCATTCTCATGGTCCTGCT      | CCCATTTCGTACACGTCATTCT  |
| SCD2                 | TGCAAGCTCTACACCTGTCTC      | GGCAATGATGAGGAAGAGCCT   |
| RARB2                | AGCTCCAAGAACCCTGCTG        | GATGCTGCGGAGATCTGTGA    |
| RXRG                 | GGCAGAGGAGCCGAGAGCGA       | GGGGATGCGTTTGGCCCACT    |
| PPARA                | GGGAAAGACCAGCAACAACC       | ATCGGACCTCTGCCTCTTTG    |
| ABCB10               | CCCAAGCGAGGGCTATGGCG       | GAATGCCGTTGGCAGCAGCG    |
| NR1H2                | AAGCAGGTGCCAGGGTTCT        | TGCATTCTGTCTCGTGGTTGT   |
| NR1H3                | AGGAGTGTGCACTTCGCAA        | CTCTTCTTGCCGCTTCAGTTT   |
| PTEN                 | CGCGGCGGGAGGACAAGTTC       | TCTGAGGTTTCTCTGGTCCTGGT |
| SCD5                 | CCCAAGCTGGAGTACGTCCTG      | TGCTTTATAGGTTCCGGTGGCT  |
| ENG                  | GGTGTTCCTGGTCCTCGTTT       | CAAAGGAGGTGACAATGCTGG   |
| NKX3.1               | ATTGTTCCGTGTCCCTTGTT       | ACTGATTGACGAAACAGGACAGA |
| CLUST                | ACTGTGTGCAAGGAGATCCG       | GTTAGCCTGGGCAGGATTGT    |
| KI67                 | TAGAGGATCTGCCTGGCTTC       | TGTCCTTGTTGGTTCCTCC     |
| CCNA2                | ATGTCAACCCCGAAAACTG        | TAAGCTCAGCTGGCCTCTTC    |
| CCNB2                | GGCTTCTGCAGGAAACTCTG       | TTTCTCGGATTTGGGAACTG    |
| CCND2                | TCCCGCAGTGTTCTATTTC        | CTGGGGCTTCACAGAGTTGT    |
| ZEB1                 | CCGGCTCCTACTCTCAACAC       | CCTCCACTGTACCATCAGTC    |
| ZEB2                 | GTAACACGTCAGTCCGTCCCC      | CAGGCTCGATCTGTGAAGTC    |
| TWIST1               | CCACTAGCAGCGGAGCTCC        | GCTCCAGAGTCTCTAGACTGTC  |
| TWIST2               | CCATGTCCGCTCCCACTAG        | GGGTCATGAGGAGCCACAAGG   |
| SNAI1                | TGGAAAGGCCTTCTCTAGGC       | GCCTGGCACTGGTATCTCTT    |
| VIMENTIN             | TGGCACGTCTTGACCTTGAA       | CTGTTCTGAATCTGGGCCT     |
| NCADH                | GTTTACAGCGCAGTCTTACC       | AGCTTCTCACAGCATAACACC   |
| ECADH                | ACGTCCATGTGTGTGACTGTG      | AGGAGCAGCAGGATCAGAATC   |
| MMP1                 | AGGGGAGAGGTGTTTTCTTCA      | TAGCTTCATAAGCAGCGTCAA   |
| MMP2                 | ACAGTGACACCACGTGACAA       | GGTCAGTGGCTTGGGGTATC    |
| MMP7                 | ATGGGCCAGGGAACACTCTA       | GTGGCCAAATTCATGGGTGG    |
| MMP9                 | CGCTCATGTACCCGCTGTAT       | CCGTGGGAGGTATAGTGGGA    |
| SREBP2               | GCTCTGTGTGCTGTGAACCT       | ACAGACTCTGGGCACGATTT    |
| HMGR                 | CTTGTGGAATGCCTTGTGATTG     | AGCCGAAGCAGCACATGAT     |
| SQS                  | TCTGCCACCGGATGGGGTGT       | TTCCACCAGCCCAGCAACG     |
| HMGCS1               | TGACATGCTCTCCGAGTACC       | CAGGAACATCCGAGCTAGAG    |
| ABCG5                | TGGATCCAACACCTCTATGCTAAA   | GGCAGGTTTTCTCGATGAACT   |
| ABCG8                | ATCGGCAACTTCACCTTCTC       | CTGATGCCGATGACAATGAG    |
| GLUT4                | CGGACACTCCATCTGTTGGG       | GGCCACGATGGAGACATAGC    |
| APOC1                | GGATGGAGGCTCTTCATCGCT      | GTTCCGGACAAATCCGGGG     |
| APOC2                | GGAGGTTGCCAAAGACCTG        | CTTGCCTGGCAGCTACTCTC    |
| LPL                  | GATGGCAAGCAACACAACCA       | TGTCCACCTCCGTGTAATC     |
| CHREBP               | TGGCAATGCTGACATGATCCA      | GGGGCGGTAATTGGTGAAGA    |
| TIMP2                | GTTTATCTACACGGCCCCCTA      | TCTGGGTGATGCTAAGCGTG    |
| FDPS                 | TCTTGGACCCCGGAGAATC        | TGTAGGAAACCAAGCCACCTC   |
| SOLE                 | TCTCAGAATGGTCGTCTGCG       | ACCAGTAAGAGGGTGCCTCA    |
| CYP7A1               | AGCAACTAAAGAACCTGCCAGTACTA | GTCCGGATATTCAAGGATGCA   |
| CYP46A1              | CACGGGTGTCTGTCCATCTG       | AATGTGACTATGGGCGCTGG    |
| CYP27A1              | GCCTCACCTATGGGATCTTCA      | TCAAAGCCTGACGCAGATG     |

| <b>Human primers</b> | <b>Forward</b>        | <b>Reverse</b>           |
|----------------------|-----------------------|--------------------------|
| ABCA1                | GCACTGAGGAAGATGCTGAAA | AGTTCCTGGAAGGTCTTGTTAC   |
| ABCG1                | CAGGAAGATTAGACACTGTGG | GAAAGGGGAATGGAGAGAAG     |
| IDOL                 | CGAGGACTGCCTCAACCA    | TGCAGTCCAAAATAGTCAACTTCT |
| FASN                 | CCCCAACCCCTGAGATCCCA  | TTGATGCCACGTTGCC         |
| SCD1                 | CTTGCGATATGCTGTGGTGC  | TGGTGGTAGTTGTGGAAGGC     |
| RXRG                 | CCCAGTGAGTGCCCCACGGA  | CCGGGGCTGGTGGATGGGTA     |
| PPARA                | TCATCCTCTCAGGAAAGGCCA | GACGGTCTCCACTGACGTG      |
| ABCB10               | CCTTTGTTTTGAGCGTGGTG  | GCCTCTTTCCTTGCTAACTG     |
| NR1H2                | AACAAACGCTCCTTCTCCGA  | GGTGATACTCTGTCTCGT       |
| NR1H3                | AGGAGTGTGCGCTTCGCAAA  | CTCTTCTTGCCGCTTCAGTTT    |
| PTEN                 | ATTCCCAGTCAGAGGCGCTA  | CACCTTAGCTGGCAGACCA      |
| SCD5                 | ATTTCTGGCTGTCGCCAACT  | GTCAGCATCCGTCTCTGAGT     |
| ENG                  | GCGGTGGTCAATATCCTGTC  | GGAAGTGTGGGCTGAGGTAG     |
| SREBP2               | GAGACCATGGAGACCTCAC   | GGAGCTACACAGCTGTTCTGA    |
| HMGCR                | TATGCCATCCCTGTTGGAG   | CACCACCACCGTTCCTATC      |
| SQS                  | ACCAAACAGTGATTGCCGAC  | ACCAGCCCAGCAACATAGTG     |
| HMGCS1               | CCGAAGGAGGAAACAGTGACA | AGGGCAACAATTCCCACATCT    |
| ABCG5                | GCCGACTGTGCATGACTGCTC | TTACATTCTTGGGTCCGCTCAG   |
| ABCG8                | CCGGGGGCTTCATGATAAACT | CTGAGGCCAATGACGATGAGGTA  |
| FDPS                 | CTCCCAGATCGTTAGGGTGC  | GCTCCCAGGATGCTACTACC     |
| SQS                  | ACCAAACAGTGATTGCCGAC  | ACCAGCCCAGCAACATAGTG     |
| SQLE                 | TTATCATCGTGGGAGCTGGC  | TGGGCATCAAGACCTTCCAC     |

**Supplementary Table 3: List of primers**

Primer sequences used for RT-qPCR analysis in mouse and human samples.
